# Supplementary material
Source: publisher site journal article supplement (https://study.sagepub.com/sites/default/files/phillips_kelly_2e_appendix_2e.doc)
Supplement: Supplementary file 1 [file phillips_kelly_2e_appendix_2e.doc]

Appendix 2(e) Visual Sequential Memory: Test and Record Sheet

**Name: Date of assessment:**

**Date of birth: Chronological age:**

**Pictures** (for younger learners)

Make two sets of identical pictures, each picture on a separate piece of card, e.g. a cat, a house, an apple, a book, a flower, a bird and a fish. (Shapes could be used.)

**Practice item**

Give the learner one of the sets of six cards keeping one for yourself.

From your set, select two pictures and place them on the table/desk in front of the learner. Say, ‘Look at these pictures’.

**Allow about 5 seconds for this**

Then cover them up and say, ‘Look at your cards. Can you make the same pattern with some of your cards’?

The learner should select the same cards and arrange them in the same sequence. Show the correct sequence so the learner can self-check. If it is clear that the learner understands what to do, repeat the process using:

1. 2 sequences of 2
2. 2 sequences of 3
3. 2 sequences of 4
4. 2 sequences of 5

**Note:** Build in a delay of 3-5 seconds before letting them put their cards down.

Write your sequence below, before testing. Stop when s/he gets **both** sequences wrong.

| Sequence | Learner’s response |
| --- | --- |
| 1 |  |
| 2 |  |
| 1 |  |
| 2 |  |
| 1 |  |
| 2 |  |
| 1 |  |
| 2 |  |

**Photocopiable**

*Assessment of Learners with Dyslexic-Type Difficulties* 2e © 2018 Sylvia Phillips and Kathleen Kelly (Sage: London).

Use the method below with both young and older learners.

Repeat the above activity using **letters** rather than pictures, using the sequences suggested below and making appropriate sets of cards.

**Letters**

**Sequence 1**

| 1. | J | P |
| --- | --- | --- |
| 2. | B | M |

**Sequence 2**

| 1. | Y | F | N |
| --- | --- | --- | --- |
| 2. | L | A | R |

Sequence 3

| 1. | X | F | M | G |
| --- | --- | --- | --- | --- |
| 2. | S | D | A | U |

Sequence 4

| 1. | W | G | T | H | O |
| --- | --- | --- | --- | --- | --- |
| 2. | K | A | M | V | J |

**Notes:** You can do this test using a set of wooden alphabet letters, having either the whole alphabet set or just the 21 used above.

**Scoring/interpreting**

In each case note the **ceiling**, i.e. how many items can be recalled correctly in sequence in **both** attempts. Note any particular difficulties (e.g. certain pictures/letters) and test behaviour, e.g. setting out their cards quickly, looking at you ‘for clues’, hesitations, etc.

For older learners e.g. at secondary school, you can use **only** letters/numbers (i.e. not the pictures) and take the sequence up to 7 items.

**Photocopiable**

*Assessment of Learners with Dyslexic-Type Difficulties* 2e © 2018 Sylvia Phillips and Kathleen Kelly (Sage: London).
